# Supplementary material for: Evaluation of novel platinum(ii) based AIE compound-encapsulated mesoporous silica nanoparticles for cancer theranostic application
Source: Royal Society of Chemistry journal article supplement (doi:10.1039/c7dt04232a), 2018-01-01
Supplement: c7dt04232a1.pdf [file c7dt04232a1.pdf]

## Supplementary Information

### **Evaluation of a Novel Platinum(II)Based AIE Compound-Encapsulated MesoporousSilica Nanoparticles for Cancer Theranostic Application**

Sheik Saleem Pasha<sup>1#</sup>, Leena Fageria<sup>2#</sup>, Clàudia Climent<sup>3</sup>, Nigam P. Rath<sup>4</sup>, Pere Alemany<sup>5</sup>,  
Rajdeep Chowdhury<sup>2\*</sup>, Aniruddha Roy<sup>6\*</sup> and Inamur Rahaman Laskar<sup>1\*</sup>

<sup>1</sup>Department of Chemistry, Pilani Campus, BITS, Pilani, Rajasthan 333031, India; <sup>2</sup>Department of Biological Sciences, Pilani Campus, BITS, Pilani, Rajasthan 333031, India; <sup>3</sup>Departamento de Física Teórica de la Materia, Universidad Autónoma de Madrid, E-28049 Madrid, Spain

<sup>4</sup>Department of Chemistry and Biochemistry, University of Missouri-St Louis, University Blvd, St Louis, MO 63121, USA; <sup>5</sup>Departament de Ciència de Materials i Química Física and Institut de Química Teòrica (IQTCUB), Universitat de Barcelona, Martí i Franquès 1, E-08028, Barcelona, Spain, <sup>6</sup>Department of Pharmacy, Pilani Campus, BITS, Pilani, Rajasthan 333031, India;

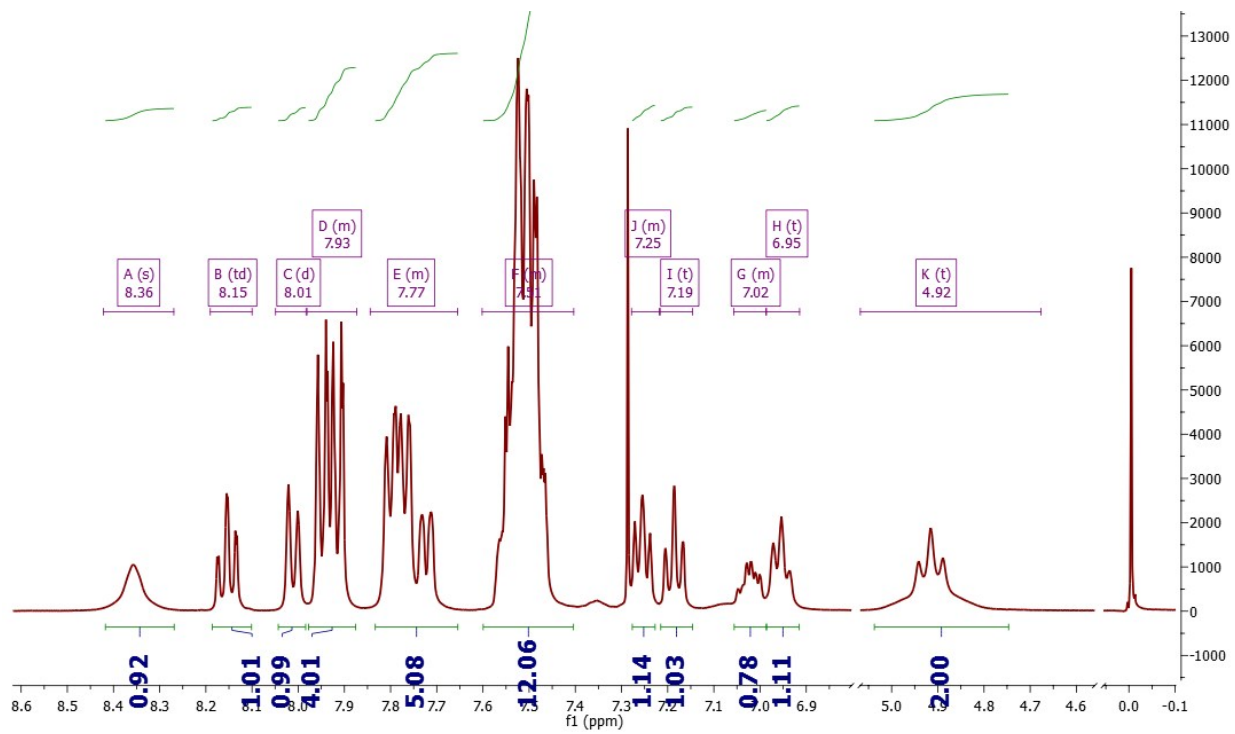

Fig.S1 <sup>1</sup>H NMR spectra of BMPP-Pt

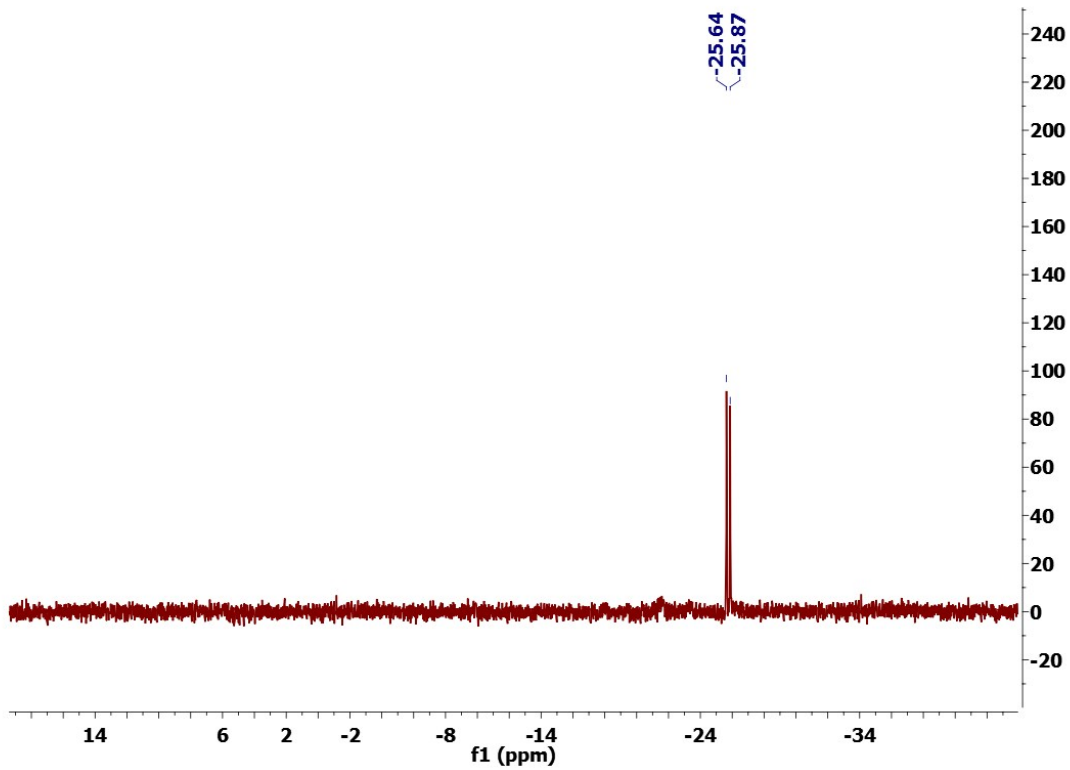

Fig. S2  $^{31}\text{P}$  NMR spectra of BMPP-Pt

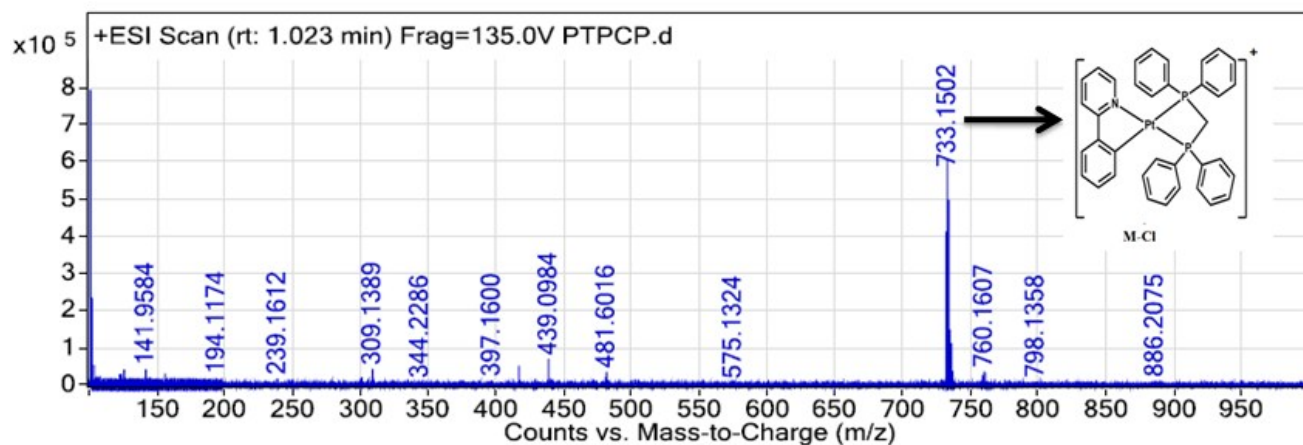

Fig. S3 Mass spectrum of BMPP-Pt

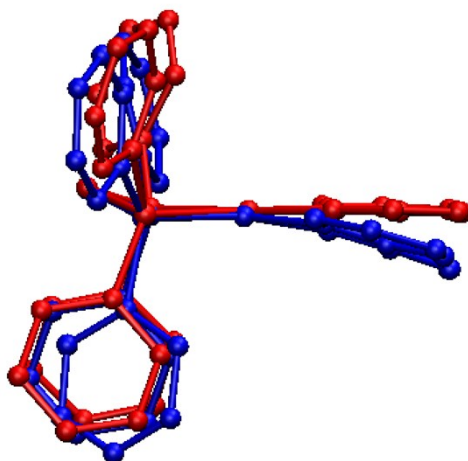

Fig. S4 Optimized BMPP-Pt ground state structure (in red) overlapped with the crystal's monomer structure (blue) showing the loss of planarity in the latter between the phenylpyridine ligand and the  $\text{Pt}(\text{P})_2$  fragment. Hydrogen atoms are omitted for the sake of clarity.

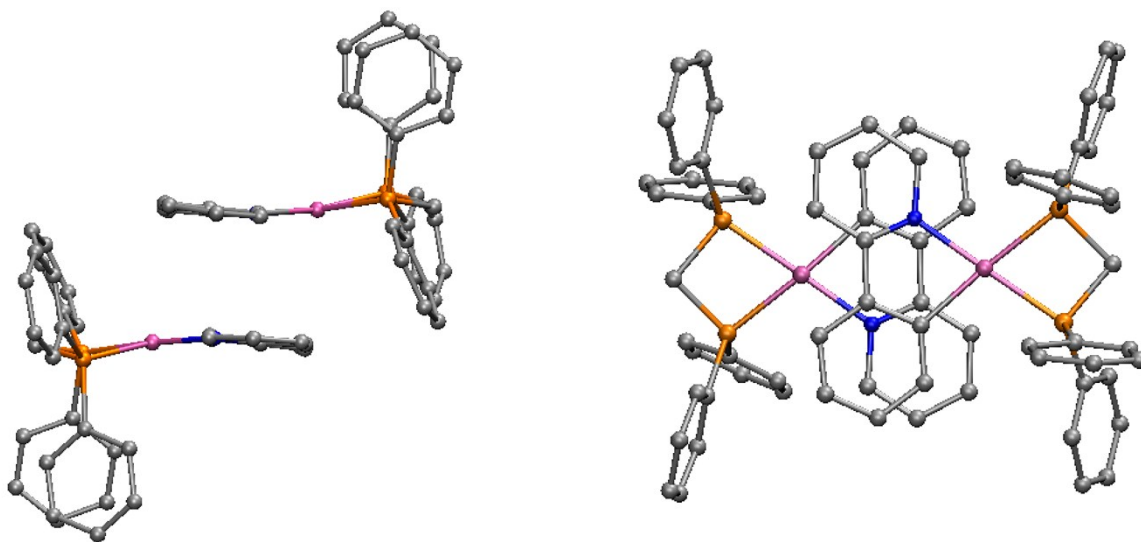

**Fig. S5** Dimers of the BMPP-Pt complex present in the crystal structure. Side view on the left and top view on the right. Hydrogen atoms are omitted for the sake of clarity.

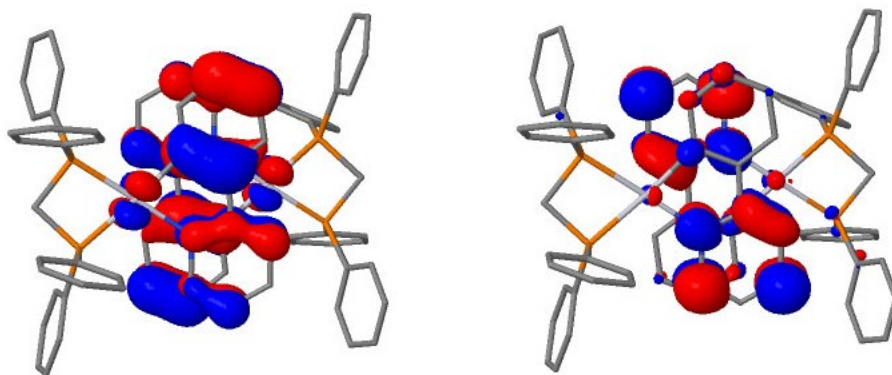

**Fig. S6** Top view of the HOMO (left) and LUMO (right) of the BMPP-Pt dimers present in the crystal structure. Hydrogen atoms are omitted for the sake of clarity.

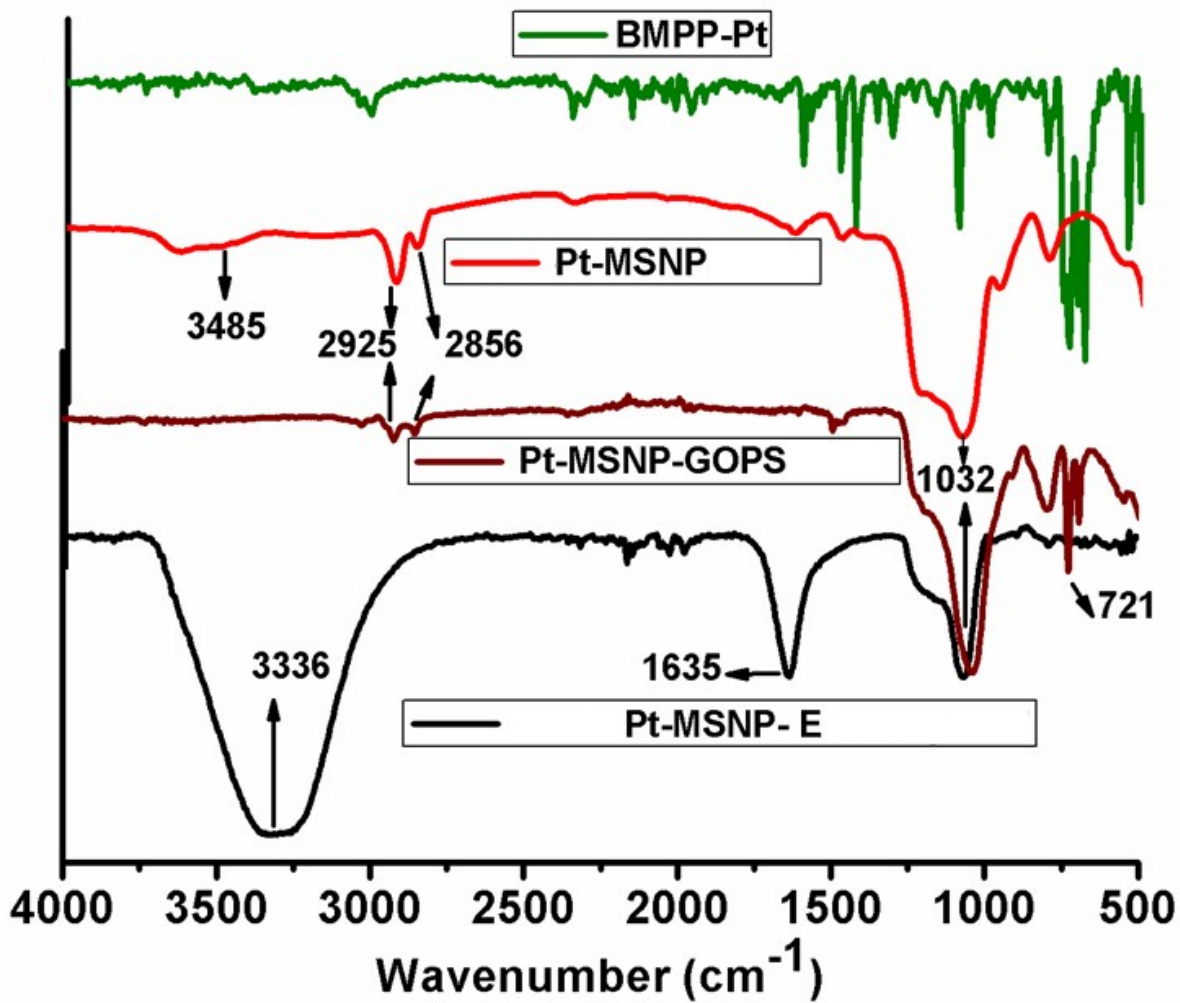

Fig. S7 FTIR spectra of free BMPP-Pt, Pt-MSNPs, Pt-MSNPs-GOPS and Pt-MSNPs-E

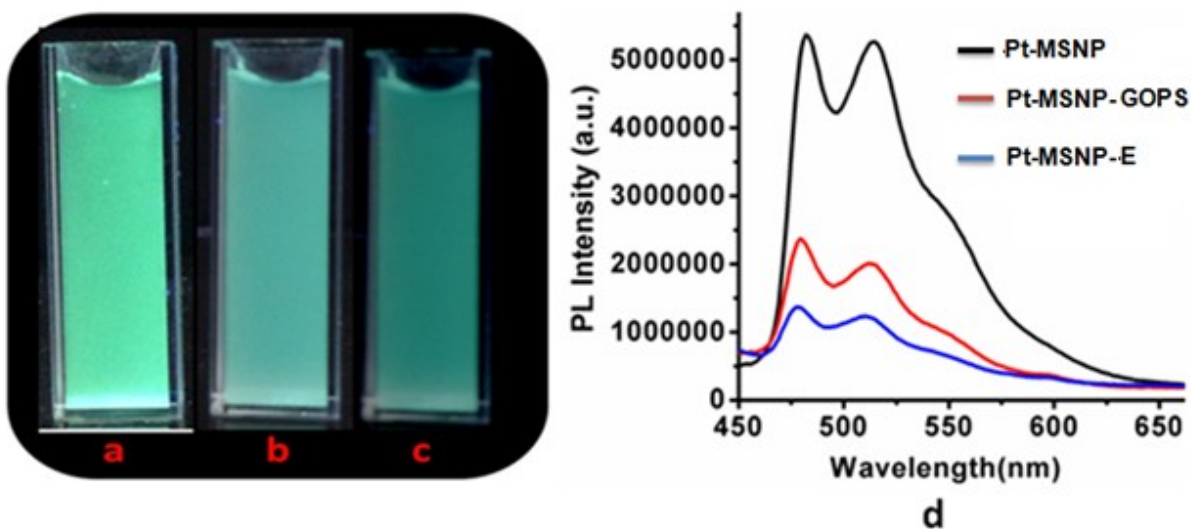

**Fig. S8** Luminescent images(left) and PL spectra (right) of Pt-MSNPs (a),Pt-MSNP-GOPS (b) and Pt-MSNP-E (c) ( $\lambda_{ex} = 365\text{nm}$ ) in water ( $c= 2\text{mg/ml}$ ).

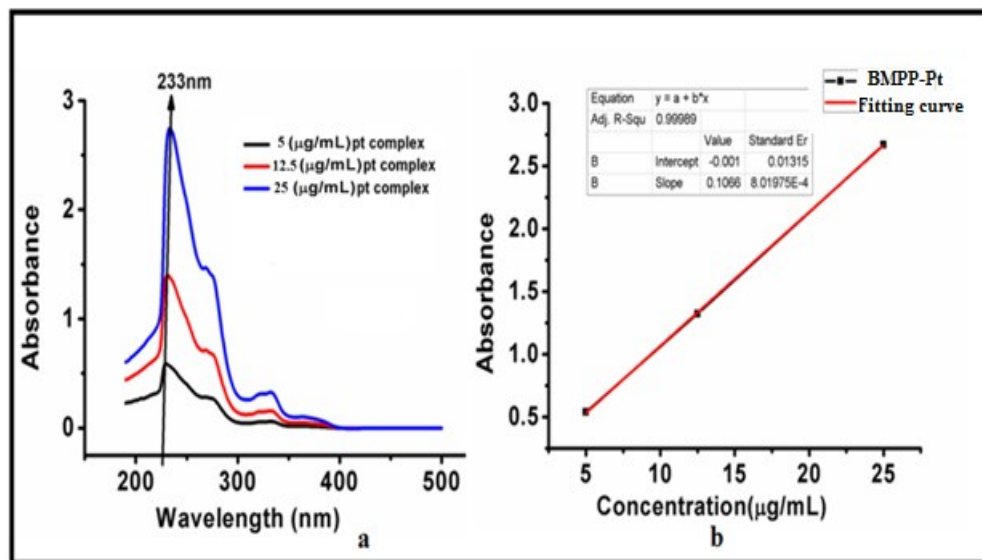

**Fig. S9**(a) Absorbance spectra of BMPP-Pt at different concentrations; (b) shows linear fitting of absorbance vs concentration graph

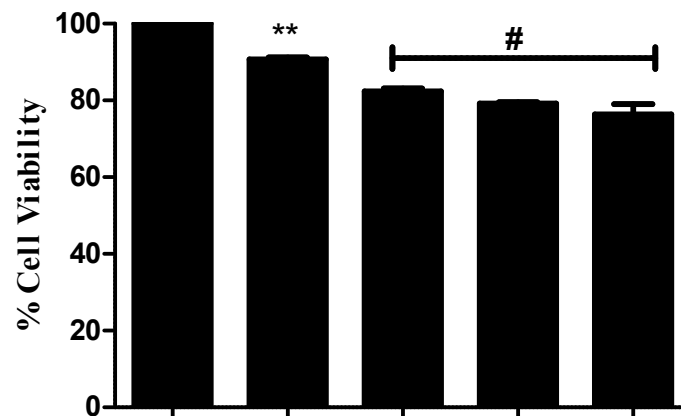

**Fig. S10** Effect of blank MSNP on viability of Huh7 cells, analyzed by MTT assay after 24 h treatment of each. (Symbol (\*\*)) represents significant difference ( $p < 0.05$ ) as compared to untreated cells; Symbol (#) represents no significant difference)

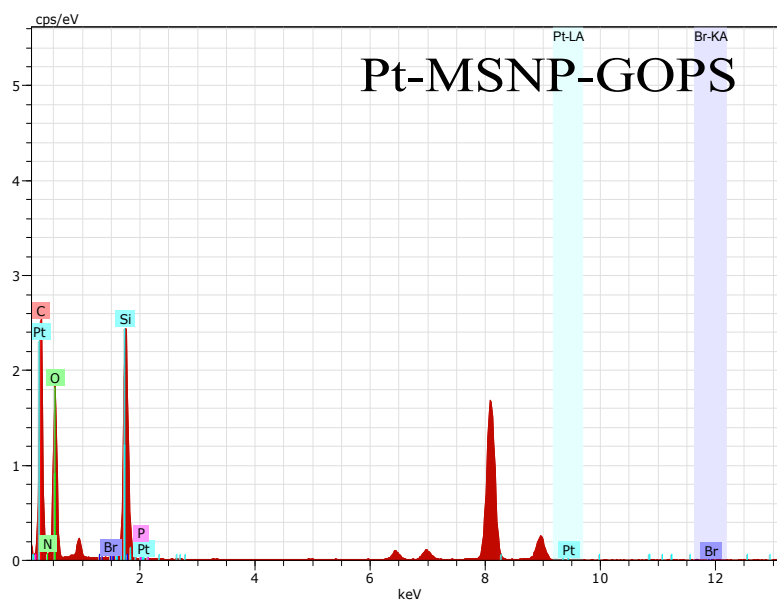

**Fig. S11** S10 EDX spectra of Pt-MSNP-GOPS

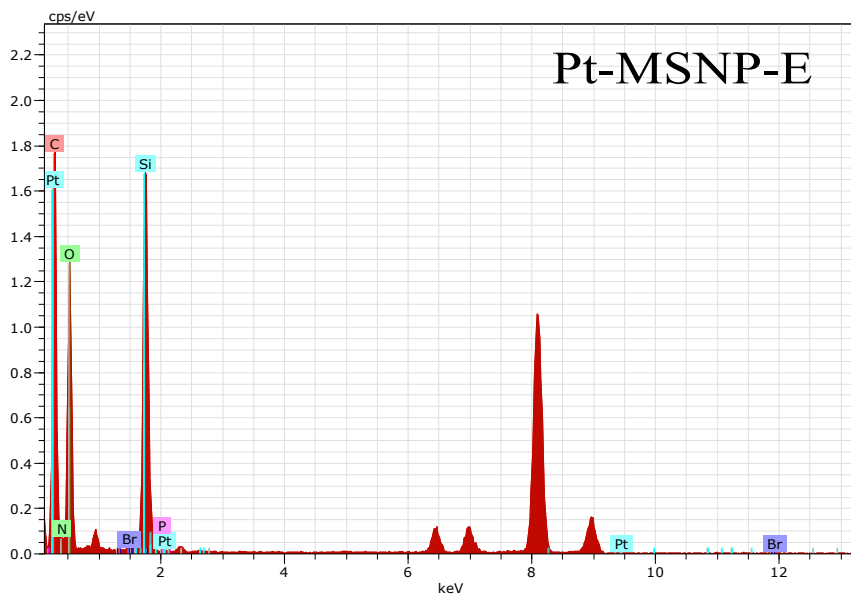

**Fig. S12**EDX spectra of Pt-MSNP-E

**Table. S1** Relevant bond lengths and dihedral angles of the BMPP-Pt complex in the crystal's monomer geometry and the optimized ground state structure.

| geometry                 | Pt-P (Å) | Pt-P (Å) | Pt-N (Å) | Pt-C (Å) | P-Pt-N-C (°) | P-Pt-C-C (°) |
|--------------------------|----------|----------|----------|----------|--------------|--------------|
| crystalmonomer           | 2.272    | 2.301    | 2.041    | 2.026    | 161          | 167          |
| optimised S <sub>0</sub> | 2.451    | 2.312    | 2.113    | 2.039    | 178          | 179          |



**Table. S2** Releasing study of BMPP-Pt from **3** (at  $\lambda_{\text{max}}$ , 233nm)

| Time (in h) | Absorbance (a.u.) |
|-------------|-------------------|
| 0           | 0.01637           |
| 6           | 0.01216           |
| 48          | 0.0178            |
| 72          | 0.0135            |
| 96          | 0.0132            |
| 120         | 0.0139            |
| 144         | 0.0142            |
| 168         | 0.0131            |
| 192         | 0.0134            |
| 216         | 0.0132            |

**Table. S3** Concentration of Elements present in Pt-MSNP-GOPS from EDX analysis

| El    | AN | Series   | unn.<br>C[wt.%] | norm.<br>C[wt.%] | Atom.<br>C[at.%] | Error (1<br>Sigma)[wt.%] |
|-------|----|----------|-----------------|------------------|------------------|--------------------------|
| C     | 6  | K-series | 81.36           | 81.36            | 88.04            | 2.50                     |
| Si    | 8  | K-series | 8.79            | 8.79             | 7.14             | 0.29                     |
| O     | 14 | K-series | 8.52            | 8.52             | 3.94             | 0.06                     |
| N     | 7  | K-series | <b>0.90</b>     | <b>0.90</b>      | <b>0.84</b>      | <b>0.06</b>              |
| Pt    | 78 | L-series | 0.39            | 0.39             | 0.03             | 0.07                     |
| P     | 15 | K-series | 0.02            | 0.02             | 0.01             | 0.03                     |
| Total |    |          | 100.00          | 100.00           | 100.00           |                          |

**Table. S4** Concentration of elements present in Pt-MSNPE

| El    | AN | Series   | unn.<br>C[wt.%] | norm.<br>C[wt.%] | Atom.<br>C[at.%] | Error (1<br>Sigma)[wt.%] |
|-------|----|----------|-----------------|------------------|------------------|--------------------------|
| C     | 6  | K-series | 81.36           | 81.36            | 88.04            | 2.50                     |
| Si    | 8  | K-series | 8.86            | 8.86             | 7.17             | 0.29                     |
| O     | 14 | K-series | 7.08            | 7.08             | 4.73             | 0.10                     |
| N     | 7  | K-series | <b>2.13</b>     | <b>2.13</b>      | <b>2.04</b>      | <b>0.08</b>              |
| Pt    | 78 | L-series | 0.37            | 0.37             | 0.02             | 0.08                     |
| P     | 15 | K-series | 0.01            | 0.01             | 0.00             | 0.03                     |
| Total |    |          | 100.00          | 100.00           | 100.00           |                          |
